# Supplementary material for: Kefir peptides alleviate particulate matter <4 μm (PM4.0)-induced pulmonary inflammation by inhibiting the NF-κB pathway using luciferase transgenic mice
Source: PubMed Central journal article supplement (PMC6687726; doi:10.1038/s41598-019-47872-4), 2019-08-08
Supplement: 41598_2019_47872_MOESM1_ESM.pdf [file 41598_2019_47872_MOESM1_ESM.pdf]

1 **Scientific Reports**

2 **Supplementary Information**

3

4 **Kefir peptides alleviate particulate matter < 4 μm (PM<sub>4.0</sub>)-induced**  
5 **pulmonary inflammation by inhibiting the NF-κB pathway using**  
6 **luciferase transgenic mice**

7 Hsiao-Ling Chen<sup>1†</sup>, Kuan-Fei Hung<sup>2†</sup>, Chih-Ching Yen<sup>2,3†</sup>, Chun-Huei Lai<sup>2</sup>, Jiun-Long  
8 Wang<sup>2,4</sup>, Ying-Wei Lan<sup>2,5</sup>, Kowit-Yu Chong<sup>5,6</sup>, Hueng-Chuen Fan<sup>7,8\*</sup>, and Chuan-Mu  
9 Chen<sup>2,9\*</sup>

10 **\*Corresponding authors: Chuan-Mu Chen, Ph.D.**

11 Professor/Dean

12 Department of Life Sciences,

13 College of Life Sciences,

14 National Chung Hsing University

15 No. 250, Kuo Kuang Rd., Taichung 402, Taiwan

16 Phone: 886-4-2285-6309; Fax: 886-4-2287-4740

17 E-mail: [chchen1@dragon.nchu.edu.tw](mailto:chchen1@dragon.nchu.edu.tw)

18 **Hueng-Chuen Fan, MD., Ph.D.**

19 Professor and Director

20 Department of Pediatrics, Tungs' Taichung Metroharbor

21 Hospital, No. 699, Sec. 8, Taiwan Blvd., Wuchi, Taichung

22 435, Taiwan

23 Phone: 886-4-2658-1919; Fax: 886-4-2658-2193

24 E-mail: [fanhuengchuen@yahoo.com.tw](mailto:fanhuengchuen@yahoo.com.tw)

1 **Table S1. Certified mass fraction values for selected PAHs in PM<sub>4.0</sub> (SRM2786)**

| Selected PAHs                                   | Mass Fraction <sup>(a)</sup> (mg/kg) |
|-------------------------------------------------|--------------------------------------|
| Fluorene <sup>(b,c,d,e,f)</sup>                 | 0.195 ± 0.014                        |
| Fluoranthene <sup>(b,c,d,e,f,g)</sup>           | 10.28 ± 0.36                         |
| Pyrene <sup>(b,c,d,e,f,g)</sup>                 | 8.01 ± 0.22                          |
| Benzo[ghi]fluoranthene <sup>(b,c,d,e,f,g)</sup> | 3.158 ± 0.098                        |
| Benzo[c]phenanthrene <sup>(b,c,d,e,f,g)</sup>   | 1.597 ± 0.052                        |
| Benz[a]anthracene <sup>(c,d,e,f)</sup>          | 4.82 ± 0.17                          |
| Chrysene <sup>(c,d)</sup>                       | 6.82 ± 0.53                          |
| Triphenylene <sup>(c,d,g)</sup>                 | 1.794 ± 0.041                        |
| Benzo[b]fluoranthene <sup>(b,e,f,g)</sup>       | 7.51 ± 0.36                          |
| Benzo[j]fluoranthene <sup>(b,e,f)</sup>         | 4.37 ± 0.32                          |
| Benzo[k]fluoranthene <sup>(b,c,d,e,f)</sup>     | 3.48 ± 0.32                          |
| Benzo[a]fluoranthene <sup>(b,c,d,e,f)</sup>     | 0.898 ± 0.037                        |
| Benzo[e]pyrene <sup>(b,c,d,e,f,g)</sup>         | 4.77 ± 0.28                          |
| Benzo[a]pyrene <sup>(b,c,d,e,f,g)</sup>         | 3.70 ± 0.13                          |
| Perylene <sup>(b,c,d,e,f,g)</sup>               | 0.769 ± 0.020                        |
| Benzo[ghi]perylene <sup>(b,c,d,e,f,g)</sup>     | 5.60 ± 0.41                          |
| Indeno[1,2,3-cd]pyrene <sup>(b,c,d,e,f,g)</sup> | 4.87 ± 0.36                          |
| Dibenz[a,c]anthracene <sup>(b,e,f,g)</sup>      | 0.509 ± 0.052                        |
| Dibenz[a,j]anthracene <sup>(b,c,d,e,f,g)</sup>  | 0.610 ± 0.015                        |
| Dibenz[a,h]anthracene <sup>(b,e,f,g)</sup>      | 0.717 ± 0.029                        |
| Benzo[b]chrysene <sup>(b,c,d,e,f,g)</sup>       | 0.662 ± 0.022                        |
| Picene <sup>(b,c,d,e,f,g)</sup>                 | 1.242 ± 0.031                        |
| Coronene <sup>(b,c,d,e,f)</sup>                 | 2.156 ± 0.087                        |
| Dibenzo[b,k]fluoranthene <sup>(b,c,d,e,f)</sup> | 1.013 ± 0.082                        |
| Dibenzo[a,e]pyrene <sup>(b,c,d,e)</sup>         | 0.812 ± 0.081                        |

2 <sup>(a)</sup> The certified value is a weighted mean of the results from three to six analytical methods<sup>S1</sup>. The  
3 uncertainty listed with each value is an expanded uncertainty about the mean, with the coverage  
4 factor,  $k = 2$  (approximately 95% confidence interval), calculated by combining a pooled  
5 within-method variance with a between-method variance following the ISO/JCGM Guide.

6 <sup>(b)</sup> GC/EI-MS Ia using PFE at 150 °C with toluene followed by analysis on a DB-17 column.

7 <sup>(c)</sup> GC/EI-MS IVa using PFE at 100 °C with toluene followed by analysis on a DB-XLB column.

8 <sup>(d)</sup> GC/EI-MS IVb using PFE at 150 °C with toluene followed by analysis on a DB-XLB column.

9 <sup>(e)</sup> GC/EI-MS V using PFE at 100 °C with DCM followed by analysis on a DB-17 MS column.

10 <sup>(f)</sup> GC/EI-MS II using PFE at 100 °C with DCM followed by analysis on a DB-17 MS column.

11 <sup>(g)</sup> GC/EI-MS Ib using PFE at 150 °C with toluene followed by analysis on a LC-50 column.

12

1 **Table S2. Certified mass fraction values for selected trace elements in PM<sub>4.0</sub>**  
 2 **(SRM2786)**

| Trace elements           | Mass Fraction <sup>(a)</sup> (mg/kg) |
|--------------------------|--------------------------------------|
| Mercury <sup>(a)</sup>   | 5.32 ± 0.14                          |
| Aluminum <sup>(b)</sup>  | 33480 ± 700                          |
| Cadmium <sup>(a)</sup>   | 4.34 ± 0.07                          |
| Chromium <sup>(b)</sup>  | 462.2 ± 1.5                          |
| Copper <sup>(b)</sup>    | 847 ± 13                             |
| Lead <sup>(a)</sup>      | 286 ± 3                              |
| Manganese <sup>(b)</sup> | 780 ± 39                             |
| Vanadium <sup>(b)</sup>  | 85.5 ± 6.5                           |

3 <sup>(a)</sup> The certified mass fraction value is the mean of results obtained using one  
 4 definitive analytical technique (ID-ICP-MS). The expanded uncertainty,  $U$ , is  
 5 calculated as  $U = kuc$ , where  $uc$  is the standard error of the dry-mass corrected  
 6 analyte mean, and the coverage factor,  $k$ , is determined from Student's  
 7  $t$ -distribution corresponding to the associated degrees of freedom and a 95%  
 8 confidence level for each analyte. The coverage factor is 3.18.

9 <sup>(b)</sup> The certified value is a weighted mean of the results from two analytical methods,  
 10 INAA and ICP-OES<sup>61</sup>. The uncertainty listed with each value is an expanded  
 11 uncertainty about the mean, with the coverage factor,  $k = 2$  (approximately 95%  
 12 confidence interval), calculated by combining a pooled within-method variance  
 13 with a between-method variance following the ISO/JCGM Guide.

14  
 15  
 16  
 17  
 18  
 19  
 20

1 **Table S3. Reference mass fraction values for inorganic constituents in PM<sub>4.0</sub>**  
 2 **(SRM2786)**

| Inorganic compound | Mass Fraction <sup>(a)</sup> (mg/kg) |
|--------------------|--------------------------------------|
| Antimony           | 192.1 ± 9.4                          |
| Arsenic            | 36.7 ± 1.1                           |
| Calcium            | 73500 ± 1900                         |
| Cesium             | 4.01 ± 0.22                          |
| Chlorine           | 17390 ± 440                          |
| Cobalt             | 19.55 ± 0.96                         |
| Iron               | 48900 ± 2400                         |
| Lanthanum          | 20.72 ± 0.68                         |
| Nickel             | 243 ± 4 <sup>(b)</sup>               |
| Samarium           | 2.840 ± 0.090                        |
| Sodium             | 14920 ± 370                          |
| Titanium           | 2460 ± 140                           |
| Zinc               | 1793 ± 88                            |

3 <sup>(a)</sup>Reference values are based on the results from the INAA study unless otherwise  
 4 noted. The associated uncertainty accounts for both random and systematic effects,  
 5 but because only one method was used, unrecognized biases may exist for some  
 6 elements in this matrix. The expanded uncertainty in the reference value is equal to  $U$   
 7 =  $kuc$ , where  $uc$  is the combined standard uncertainty and  $k$  is the coverage factor,  
 8 both calculated according to the ISO/JCGM Guide. The value of  $uc$  is intended to  
 9 represent, at the level of one standard deviation, the uncertainty in the mass fraction  
 10 value. Here,  $uc$  accounts for within-method variation and material inhomogeneity.  
 11 The coverage factor,  $k$ , is Student's  $t$ -value for a 95% confidence interval with the  
 12 corresponding degrees of freedom ( $df = 23$ ).

13 <sup>(b)</sup>The reference mass fraction value is the mean of the results obtained using one  
 14 analytical technique (ICP-OES). The expanded uncertainty,  $U$ , is calculated as  $U =$   
 15  $kuc$ , where  $uc$  is the standard error of the dry-mass corrected analyte mean, and the  
 16 coverage factor,  $k$ , is determined from Student's  $t$ -distribution corresponding to six  
 17 degrees of freedom and a 95 % confidence level for each analyte. The coverage  
 18 factor  $k$  is 2.45.

19

1 **Supplementary reference**

2

3 S1. DerSimonian, R. & Laird, N. Meta-analysis in clinical trials. *Control Clin Trials*. **7**,  
4 177-188 (1986).

5
